# Supplementary material for: Stockholm score of lesion detection on computed tomography following mild traumatic brain injury (SELECT-TBI): study protocol for a multicentre, retrospective, observational cohort study
Source: HighWire-hosted journal article supplement (doi:10.1136/bmjopen-2021-060679), 2022-09-01
Supplement: bmjopen-2021-060679supp001_data_supplement.pdf [file bmjopen-2021-060679supp001_data_supplement.pdf]

Confidential

Page 1

## Variable list

---

Patient ID \_\_\_\_\_

---

Hospital  Danderyds Sjukhus  
 Karolinska Universitetssjukhuset Solna  
 Karolinska Universitetssjukhuset Huddinge  
 Norrtälje Sjukhus  
 S:t Görans Sjukhus  
 Södertälje Sjukhus  
 Södersjukhuset  
(Hospital where the emergency department was located)

---

1 Sex  Male  Female

---

2 Age \_\_\_\_\_  
(Years)

---

3 Date of trauma \_\_\_\_\_  
(YYYY-MM-DD (if unknown, leave blank))

---

Time of trauma \_\_\_\_\_  
(HH:MM (if unknown, leave blank))

---

4 Emergency department admission date \_\_\_\_\_  
(YYYY-MM-DD (if unknown, leave blank))

---

Emergency department admission time \_\_\_\_\_  
(HH:MM (if unknown, leave blank))

---

5 Time from injury to emergency department admission  0-3 hours  
 3-6 hours  
 6-12 hours  
 12-24 hours  
 Unknow

---

6 Doctor assessment date \_\_\_\_\_  
(YYYY-MM-DD (if unknown, leave blank))

---

Doctor assessment time \_\_\_\_\_  
(HH:MM (if unknown, leave blank))

---

7 Date of discharge from emergency room \_\_\_\_\_  
(YYYY-MM-DD (if unknown, leave blank))

Confidential

Page 2

Time of discharge from emergency room

(HH:MM (if unknown, leave blank))

8 Comorbidities

- None of the below  
 Dementia  
 Alcoholism  
 Liver cirrhosis  
 Chronic renal impairment  
 Intraventricular shunt  
 Anticoagulation treatment  
 Antiplatelet treatment  
 Bleeding disorder  
 (Select all that apply)

If "anticoagulation treatment" = yes, specify type(s)

- Warfarin  
 Apixaban (Eliquis)  
 Rivaroxaban (Xarelto)  
 Dabigatran (Pradaxa)  
 Edoxaban (Lixiana)  
 LMWH (low-molecular-weight heparin)  
 Other  
 (Select all that apply)

If "antiplatelet treatment" = yes, specify type(s)

- ASA (Tromblyl)  
 Clopidogrel (Plavix)  
 Ticagrelor (Brilique)  
 Prasugrel (Effient)  
 Dipyridamole (Persantin)  
 Ticlopidine (Ticlid)  
 Eptifibatide (Integrilin)  
 Other  
 (Select all that apply)

If "bleeding disorder" = yes, specify type

9 Trauma mechanism

- Low energy fall (same level)  
 High energy fall (> 1 meter or > 5 steps)  
 Motor vehicle accident (not motorcycle)  
 Motorcycle accident  
 Bicycle accident  
 Pedestrian hit by traffic  
 Other traffic accident  
 Shot by gun  
 Stabbed by sharp object  
 Struck by blunt object  
 Blast injury (e.g. explosion)  
 Other  
 Unknown

10 Multitrauma

- Yes  No  
 (Defined as radiology ordered for body part other than brain / cervical spine due to suspicion of traumatic injury)

Confidential

Page 3

---

|                                 |                                                                                                                                                                                                                                               |
|---------------------------------|-----------------------------------------------------------------------------------------------------------------------------------------------------------------------------------------------------------------------------------------------|
| If "multitrauma" = yes, specify | <input type="checkbox"/> Thorax<br><input type="checkbox"/> Abdomen<br><input type="checkbox"/> Spine (thoracic or lumbar)<br><input type="checkbox"/> Upper Extremity<br><input type="checkbox"/> Lower Extremity<br>(Select all that apply) |
|---------------------------------|-----------------------------------------------------------------------------------------------------------------------------------------------------------------------------------------------------------------------------------------------|

---

|                           |                                                                                                                                         |
|---------------------------|-----------------------------------------------------------------------------------------------------------------------------------------|
| 11 GCS = 15 before injury | <input type="radio"/> Yes <input type="radio"/> No<br>("No" means that the patient was GCS 14 or below prior to injury (e.g. dementia)) |
|---------------------------|-----------------------------------------------------------------------------------------------------------------------------------------|

---

|                                          |                                                                                                                                                                              |
|------------------------------------------|------------------------------------------------------------------------------------------------------------------------------------------------------------------------------|
| 12 GCS on emergency department admission | <input type="radio"/> GCS = 15<br><input type="radio"/> GCS = 14<br><input type="radio"/> GCS = 13<br>(GCS when the physician performed the first assessment of the patient) |
|------------------------------------------|------------------------------------------------------------------------------------------------------------------------------------------------------------------------------|

---

|               |                                                                                                                                                                                            |
|---------------|--------------------------------------------------------------------------------------------------------------------------------------------------------------------------------------------|
| GCS eye score | <input type="radio"/> 4 (eyes open spontaneously)<br><input type="radio"/> 3 (eyes open to verbal command)<br><input type="radio"/> 2 (eyes open to pain)<br><input type="radio"/> Unknown |
|---------------|--------------------------------------------------------------------------------------------------------------------------------------------------------------------------------------------|

---

|                  |                                                                                                                                                                                      |
|------------------|--------------------------------------------------------------------------------------------------------------------------------------------------------------------------------------|
| GCS verbal score | <input type="radio"/> 5 (orientated to time, person, place)<br><input type="radio"/> 4 (confused)<br><input type="radio"/> 3 (innappropriate words)<br><input type="radio"/> Unknown |
|------------------|--------------------------------------------------------------------------------------------------------------------------------------------------------------------------------------|

---

|                 |                                                                                                                                                                                       |
|-----------------|---------------------------------------------------------------------------------------------------------------------------------------------------------------------------------------|
| GCS motor score | <input type="radio"/> 6 (obeys command)<br><input type="radio"/> 5 (moves to localised pain)<br><input type="radio"/> 4 (flex to withdraw from pain)<br><input type="radio"/> Unknown |
|-----------------|---------------------------------------------------------------------------------------------------------------------------------------------------------------------------------------|

---

|                                                |                                                                                                             |
|------------------------------------------------|-------------------------------------------------------------------------------------------------------------|
| 13 Deterioration in GCS after first assessment | <input type="radio"/> Yes <input type="radio"/> No<br>(Deteriorated in GCS after initial assessment of GCS) |
|------------------------------------------------|-------------------------------------------------------------------------------------------------------------|

---

|                |                                                                                                  |
|----------------|--------------------------------------------------------------------------------------------------|
| 14 Intoxicated | <input type="radio"/> Yes <input type="radio"/> No<br>(Intoxicated on assessment (e.g. alcohol)) |
|----------------|--------------------------------------------------------------------------------------------------|

---

|                                              |                                                                                                                                                                                                                                                                                                                                                                     |
|----------------------------------------------|---------------------------------------------------------------------------------------------------------------------------------------------------------------------------------------------------------------------------------------------------------------------------------------------------------------------------------------------------------------------|
| If "intoxicated" = yes, specify substance(s) | <input type="checkbox"/> Alcohol<br><input type="checkbox"/> Central stimulants (e.g. amphetamines, cocaine, LSD, ecstasy)<br><input type="checkbox"/> Anxiolytics (e.g. benzodiazepines)<br><input type="checkbox"/> Cannabis<br><input type="checkbox"/> Opioids<br><input type="checkbox"/> Other<br><input type="checkbox"/> Unknown<br>(Select all that apply) |
|----------------------------------------------|---------------------------------------------------------------------------------------------------------------------------------------------------------------------------------------------------------------------------------------------------------------------------------------------------------------------------------------------------------------------|

---

|                     |                                                                                                                                                             |
|---------------------|-------------------------------------------------------------------------------------------------------------------------------------------------------------|
| 15 Pupillary status | <input type="radio"/> Normal<br><input type="radio"/> Unilateral dilation<br><input type="radio"/> Bilateral dilation<br>(If not detailed, choose "normal") |
|---------------------|-------------------------------------------------------------------------------------------------------------------------------------------------------------|

---

|                                                   |                                                    |
|---------------------------------------------------|----------------------------------------------------|
| If abnormal pupillary status - reactive to light? | <input type="radio"/> Yes <input type="radio"/> No |
|---------------------------------------------------|----------------------------------------------------|

Confidential

Page 4

- 16 Post-traumatic neurological deficit
- None of the below
  - Weakness in extremity
  - Numbness in extremity
  - Diplopia (double-vision)
  - Blurry vision
  - Dysphasia (problems with speech)
  - Dizziness / loss of balance
  - Loss of coordination
  - Other
- (Select all that apply. Do NOT check if patient had impairment prior to injury (e.g. already paralyzed patient))

If "other deficit" = yes, specify

---

- 17 Other worrisome factors
- None of the below
  - Amnesia
  - Confirmed loss of consciousness
  - Suspected loss of consciousness (e.g. if patient is unsure)
  - Vomiting
  - Persistent headache
  - Seizure
  - Scalp wound that needed suturing (excl. face)
  - Suspected open or depressed skull fracture
  - Sign(s) of skull base fracture
- (Select all that apply)

If "amnesia" = yes, specify type(s)

- Retrograde (can't recall entire traumatic event)
- Anterograde (can't remember new information)
- Combined retrograde and anterograde
- Unknown / missing

If "loss of consciousness" = yes, specify if it was due to the head injury (i.e. not syncope / fainting)

- Yes
- No
- Unclear

If "vomiting" = yes, specify amount

- Once
- More than once
- Unknown / missing

If "sign(s) of skull base fracture" = yes, specify

- Racoon-eyes (bruising around eye - "black eye", "brillenhematoma")
- Battle's sign (bruising of the mastoid process behind ear)
- Rhinorrhea (CSF-leak from nose)
- Otorrhea (CSF-leak from ear)
- Anosmia (loss of smell)
- Hematotympanon (blood behind ear drum)
- Deafness
- Nystagmus
- Facial nerve paralysis
- Other

If "other sign(s) of skull base fracture" = yes, specify

---

- 18 Lab sampled  Yes  No

Confidential

Page 5

|                                                       |                                                                                                                                                                                                                                                                                                                                                                                                                                                                                                                                                                      |
|-------------------------------------------------------|----------------------------------------------------------------------------------------------------------------------------------------------------------------------------------------------------------------------------------------------------------------------------------------------------------------------------------------------------------------------------------------------------------------------------------------------------------------------------------------------------------------------------------------------------------------------|
| Date of lab sampling (first test)                     | <input type="text"/>                                                                                                                                                                                                                                                                                                                                                                                                                                                                                                                                                 |
|                                                       | (YYYY-MM-DD)                                                                                                                                                                                                                                                                                                                                                                                                                                                                                                                                                         |
| Time of lab sampling (first test)                     | <input type="text"/>                                                                                                                                                                                                                                                                                                                                                                                                                                                                                                                                                 |
|                                                       | (HH:MM)                                                                                                                                                                                                                                                                                                                                                                                                                                                                                                                                                              |
| S100B                                                 | <input type="text"/>                                                                                                                                                                                                                                                                                                                                                                                                                                                                                                                                                 |
|                                                       | (µg/L)                                                                                                                                                                                                                                                                                                                                                                                                                                                                                                                                                               |
| PK(INR)                                               | <input type="text"/>                                                                                                                                                                                                                                                                                                                                                                                                                                                                                                                                                 |
| APT-time                                              | <input type="text"/>                                                                                                                                                                                                                                                                                                                                                                                                                                                                                                                                                 |
|                                                       | (seconds)                                                                                                                                                                                                                                                                                                                                                                                                                                                                                                                                                            |
| Hemoglobin (Hb)                                       | <input type="text"/>                                                                                                                                                                                                                                                                                                                                                                                                                                                                                                                                                 |
|                                                       | (g/L)                                                                                                                                                                                                                                                                                                                                                                                                                                                                                                                                                                |
| Platelet count                                        | <input type="text"/>                                                                                                                                                                                                                                                                                                                                                                                                                                                                                                                                                 |
|                                                       | (150 x 10 <sup>9</sup> /L)                                                                                                                                                                                                                                                                                                                                                                                                                                                                                                                                           |
| Serum ethanol                                         | <input type="text"/>                                                                                                                                                                                                                                                                                                                                                                                                                                                                                                                                                 |
|                                                       | (mmol/L)                                                                                                                                                                                                                                                                                                                                                                                                                                                                                                                                                             |
| Alcohol promille level (breathalyzer)                 | <input type="text"/>                                                                                                                                                                                                                                                                                                                                                                                                                                                                                                                                                 |
|                                                       | (promille)                                                                                                                                                                                                                                                                                                                                                                                                                                                                                                                                                           |
| 19 Date of CT scan                                    | <input type="text"/>                                                                                                                                                                                                                                                                                                                                                                                                                                                                                                                                                 |
|                                                       | (YYYY-MM-DD)                                                                                                                                                                                                                                                                                                                                                                                                                                                                                                                                                         |
| Time of CT scan                                       | <input type="text"/>                                                                                                                                                                                                                                                                                                                                                                                                                                                                                                                                                 |
|                                                       | (HH:MM)                                                                                                                                                                                                                                                                                                                                                                                                                                                                                                                                                              |
| 20 Intracranial lesion on CT                          | <input type="radio"/> Yes <input type="radio"/> No                                                                                                                                                                                                                                                                                                                                                                                                                                                                                                                   |
| If "intracranial lesion on CT" = yes, specify type(s) | <input type="checkbox"/> Cerebral contusion<br><input type="checkbox"/> Traumatic subarachnoid haemorrhage<br><input type="checkbox"/> Epidural hematoma<br><input type="checkbox"/> Acute subdural hematoma<br><input type="checkbox"/> Chronic subdural hematoma<br><input type="checkbox"/> Intraventricular hematoma<br><input type="checkbox"/> Diffuse axonal injury<br><input type="checkbox"/> Sinus thrombosis<br><input type="checkbox"/> Traumatic infarct<br><input type="checkbox"/> Skull fracture (neurocranium, not face)<br>(Select all that apply) |

Confidential

Page 6

If "skull fracture" = yes, specify type(s)

- Linear fracture with impression  
 Linear fracture without impression  
 Crush fracture with impression  
 Crush fracture without impression  
 Other

If "intracranial lesion on CT" = yes, specify management

- None (sent home from emergency department)  
 Admission < 48 hours due to TBI ("overnight observation")  
 Admission > 48 hours due to TBI  
 Paus or reversal of anticoagulants or antiplatelets  
 Intubated due to TBI  
 Transfer to neurosurgical department  
 Death due to TBI  
 (Select all that apply)

If patient was admitted due to TBI, specify amount of days in hospital

\_\_\_\_\_

Follow-up CT performed

- Yes  No

If "follow-up CT performed" = yes, specify reason(s)

- Decided on admission regardless of neurology  
 Decreased consciousness  
 Increased headache  
 New neurological abnormality  
 Vomiting  
 Other  
 Unclear / unknown

If "follow-up CT performed" = yes, specify if the lesion progressed

- Yes  No

21 Re-admission within 30 days with CT-verified intracranial lesion

- Yes  No
